# Supplementary material for: The acute myeloid leukemia associated AML1-ETO fusion protein alters the transcriptome and cellular progression in a single-oncogene expressing in vitro induced pluripotent stem cell based granulocyte differentiation model
Source: PLOS journal article supplement (doi:10.1371/journal.pone.0226435), 2019-12-23
Supplement: S5 (10.1371/journal.pone.0226435.s005) [file journal.pone.0226435.s005]

## Supplemental Table 1

### Gene Ontology Pathway Analysis

#### Cluster 1

| Go term Biological Process         | Binom Raw p-value |
|------------------------------------|-------------------|
| multicellular organism development | 1.48E-17          |
| developmental process              | 1.96E-15          |
| regionalization                    | 5.90E-12          |
| cell differentiation               | 8.97E-12          |
| cellular developmental process     | 1.99E-11          |
| pattern specification process      | 3.29E-11          |

#### Cluster 3

| Go term Biological Process | Binom Raw p-value |
|----------------------------|-------------------|
| defense response           | 2.38E-15          |
| inflammatory response      | 1.11E-13          |
| response to stress         | 1.15E-12          |
| immune response            | 1.48E-12          |
| regulation of angiogenesis | 4.56E-09          |
| endocytosis                | 3.08E-08          |

#### Cluster 4

| Go term Biological Process         | Binom Raw p-value |
|------------------------------------|-------------------|
| system development                 | 3.01E-23          |
| multicellular organism development | 1.45E-22          |
| developmental process              | 1.28E-20          |
| cell differentiation               | 5.00E-18          |
| extracellular matrix organization  | 2.82E-12          |
| cell fate commitment               | 1.71E-08          |
